# Supplementary material
Source: PubMed Central journal article supplement (PMC7383397)
Supplement: supp_RA120.014000_160327_2_supp_535289_qgqvg6.pdf [file supp_RA120.014000_160327_2_supp_535289_qgqvg6.pdf]

## Supporting Information

### Bacterial lyso-form lipoproteins are synthesized via an *intra*-molecular acyl chain migration

Krista M. Armbruster, Gloria Komazin, Timothy C. Meredith

### Contents

- Table S1.** Primers used in this study.
- Table S2.** Topology predictions for *E. faecalis* Lit.
- Figure S1.** LPL-treatment of [d5]-DA-LppK58A strep removes the *sn*-1 acyl chain.
- Figure S2.** MALDI-TOF MS of lyso-LppK58A strep recovered from *in vitro* reaction with *E. faecalis* Lit.
- Figure S3.** Mut-seq analysis of *E. faecalis* Lit by Ala scanning.
- Figure S4.** Randomization of His89 and His157 codon.

**TABLE S1. Primers used in this study.**

| Primer Name | Description                              | Primer Sequence                                                   |
|-------------|------------------------------------------|-------------------------------------------------------------------|
| TM692       | 5'- <i>Int</i> ::Spt <sup>r</sup>        | GCCTCATTAATTGAACGCCAGCGCATTGCGCTGCTGCTGGCGATTCCC<br>CTGCTCGCGCAG  |
| TM693       | <i>Int</i> ::Spt <sup>r</sup> -3'        | CACAGCAGCAAAACCAAACAATGCCGTCAGCACCCACAGCGGGCTTG<br>AACGAATTGTTAG  |
| KA1053      | 5'-pET22b(+) <i>Eflit</i>                | CTTTAAGAAGGAGATATACATATGATGAGGTGCGAAATTGCG                        |
| KA1054      | pET22b(+) <i>Eflit</i> -3'               | GTGGTGGTGGTGGTGGTGGCCGCCCTTTTTTAAAGAACGTTTTCCG                    |
| TM1121      | 5'- <i>fadE</i> ::Tet <sup>r</sup>       | GATTTTGAGTATTCTCGCTACGGTTGCTGCTCGGCGCGTTCAAATGT<br>AGCACCTGAAG    |
| TM1122      | <i>fadE</i> ::Tet <sup>r</sup> -3'       | GTCGCCAGCTCTTCCGGATCAAAGTCATCAACGTTAATACTGGAATCCG<br>TTAGCGAGGTG  |
| TM1123      | 5'- <i>fadE</i> upcheck                  | CCATATCATCACAAGTGGTCAGACC                                         |
| TM1124      | <i>fadE</i> downcheck-3'                 | CAACTTCCGCACTTTCTCCGGCAAC                                         |
| TM1130      | 5'-pKA522 PA3286                         | CTGTGAAGTGAAGCTGAGAGAAGAGGAACAACACTATGCATAAAGCC                   |
| TM1131      | pKA522 PA3286-3'                         | GGACTCTGGGGTTCGGCCACGATCAGTGTTTAC                                 |
| KA1245      | 5'- <i>fadR</i> ::Tmp <sup>r</sup>       | GTCATTAAGGCGCAAAGCCC GGCGGGTTTCGCGGAAGAGTACGGATA<br>GACGGCATGCACG |
| KA1246      | <i>fadR</i> ::Tmp <sup>r</sup> -3'       | CAAATCTCGCCACTCTCATGCCATAGCGACGCACTGTGAATCCGTTG<br>CTGCCAC        |
| KA1247      | 5'- <i>fadR</i> upcheck                  | GGTATGATGAGTCCAAC                                                 |
| KA1248      | <i>fadR</i> downcheck-3'                 | CATCGAGTTGCTGGAACG                                                |
| TM1476      | 5'- <i>lolCDE</i>                        | GACCGACAAAAGCTACAGCAACCAGACGG                                     |
| TM1477      | <i>lolCDE</i> -3'                        | TTACTGTCGGGAATTCTTGTTTTAATGTACTGCC                                |
| TM1614      | 5'- <i>fabH</i> upcheck                  | GGACACCTCTGACGAGTGGATTG                                           |
| TM1615      | <i>fabH</i> downcheck-3'                 | CACGATCGGTTGGATCGCAGGTG                                           |
| TM1689      | 5'- <i>fabH</i> ::Cm <sup>r</sup> FRT    | CGCCACATTGCCGCGCCAAACGAAACCGTTTCAACCATGGGCTATGA<br>ATATCCTCCTTAG  |
| TM1690      | <i>fabH</i> ::Cm <sup>r</sup> FRT-3'     | CCGCCCCAGATTTACGTTATTGATCGGCTACGCTTAATGCATGTAGG<br>CTGGAGCTGCTTC  |
| TM1722      | 5'- <i>fadD</i> (V451A)                  | GCTAATGCGCAGGAATCCTTCTTCATCC                                      |
| TM1723      | <i>fadD</i> (V451A)-3'                   | TTCCTGCGCATTAGCGATCGTAAAAAAGAC                                    |
| TM1990      | 5'-pET22b(+) <i>Eflit</i>                | AGAAGGAGATATACATATGATGAGGTGCG                                     |
| SS1314      | pET22b(+) <i>Eflit</i> -3'               | GGTGGTGGTGCTCGAGTTCACTTTTCTCTC                                    |
| SS1562      | 5'-pET22b(+) <i>phoA</i>                 | GAAGGAGATATACATATGAAACAAAGCACTATTGC                               |
| SS1316      | pET22b(+) <i>phoA</i> -3'                | GGTGGTGGTGCTCGACGCGGTTTTATTCA                                     |
| SS1317      | 5'-pET22b(+) <i>lacZ</i>                 | CTTTAAGAAGGAGATATACAAACAGCTATGACCATG                              |
| SS1318      | pET22b(+) <i>lacZ</i> -3'                | GGTGGTGGTGCTCGAGTTCAGCAAGCTTTT                                    |
| SS1502      | 5'-(+9) <i>lacZ</i>                      | GCCGTCGTTTTACAACG                                                 |
| SS1503      | 5'-(+13) <i>phoA</i>                     | TTACTGTTTACCCCTGTG                                                |
| SS1275      | <i>Eflit</i> K212 fusion-3'              | TTTTTTTAAAGAACGTTTTCCG                                            |
| SS1276      | 5'- <i>Eflit</i> K212 <i>lacZ</i> fusion | CGTTCTTTAAAAAAGCCGTCGTTTTACAAC                                    |
| SS1504      | 5'- <i>Eflit</i> K212 <i>phoA</i>        | CACAGGGGTAAACAGTAATTTTTTTTAAAGAACG                                |

|        | fusion                                 |                                                |
|--------|----------------------------------------|------------------------------------------------|
| SS1505 | <i>EflitD52 lacZ</i> fusion-3'         | CGTTGTAAAACGACGGCATCAACCTCTACGTC               |
| SS1506 | <i>EflitD52 phoA</i> fusion-3'         | CACAGGGGTAAACAGTAAATCAACCTCTACGTC              |
| SS1507 | <i>EflitR129 lacZ</i> fusion-3'        | CGTTGTAAAACGACGGCCCGTATCAATGTCCA               |
| SS1508 | <i>EflitR129 phoA</i> fusion-3'        | CACAGGGGTAAACAGTAAACCGTATCAATGTCCA             |
| SS1509 | <i>EflitD173 lacZ</i> fusion-3'        | CGTTGTAAAACGACGGCATCAGTCAGCGGATT               |
| SS1510 | <i>EflitD173 phoA</i> fusion-3'        | CACAGGGGTAAACAGTAAATCAGTCAGCGGATT              |
| TM1987 | 5'-pET <i>Eflit</i> streptag           | TGGAGTCATCCTCAATTTGAAAAATAATGAAGAGAGAAAAGTGAAC |
| TM1988 | pET <i>Eflit</i> streptag-3'           | TTGAGGATGACTCCACGCTGAACCGGATCCTTTTTTAAAGAACG   |
| TM1924 | 5'- <i>Eflit</i> Mutseq                | CCGTGACCAACTTTAAGAAGGAGATATAC                  |
| TM1925 | <i>Eflit</i> Mutseq-3'                 | CCAGTGCTCGAGTTCACTTTTCTCTC                     |
| TM2182 | 5'- <i>Eflit</i> H89                   | TTTTATGAAGTGAAAAAATTGTTTTATTGTGCTATG           |
| TM2183 | <i>Eflit</i> H89-3'                    | TTTCACTTCATAAAAMNNAAGCCGCGCTATCAGAC            |
| TM2184 | 5'- <i>Eflit</i> H157                  | GGATTATTTTTAACACGATGCTTGGTTATTTAATCC           |
| TM2185 | <i>Eflit</i> H157-3'                   | GTTAAAAAATAATCCMNAACGCAATAAAAAATTGATCAAAGCC    |
| TM2149 | 5'-pET22 to PLI50 Ppen<br><i>XbaI</i>  | TATTGTGCTAGACTCTAGAAATAATTTTGTTTAAC            |
| TM2150 | pET22 to PLI50 Ppen<br><i>AscI</i> -3' | TTAGAATAGGCGGCCCTCGAGTTCACTTTTCTCTC            |
| TM1939 | 5'- <i>Eflit</i> L6C                   | TCGAAATGTCGTTTAAGGGAAACAC                      |
| TM1940 | <i>Eflit</i> L6C-3'                    | TAAACGACATTTTCGACCTCATATA                      |
| TM1941 | 5'- <i>Eflit</i> V54C                  | GATCGTTGTACCTTGATTAATAAATT                     |
| TM1942 | <i>Eflit</i> V54C-3'                   | CAAGGTACAACGATCAACCTCTACG                      |
| TM1958 | 5'- <i>Eflit</i> A165C                 | AACGATTGTTGGTTATTTAATCCGC                      |
| TM1959 | <i>Eflit</i> A165C-3'                  | TAACCAACAATCGTTGTTAAAAAATAATCC                 |
| TM1945 | 5'- <i>Eflit</i> L171C                 | AATCCGTGTACTGATCCGATTATCA                      |
| TM1946 | <i>Eflit</i> L171C-3'                  | ATCAGTACACGGATTAATAACCAA                       |
| TM1947 | 5'- <i>Eflit</i> S209C                 | AAACGTTGTTAAAAAAGGCGGCG                        |
| TM1948 | <i>Eflit</i> S209C-3'                  | TTTTAAACAACGTTTTCCGATTAAA                      |

TABLE S2. Topology predictions for *E. faecalis* Lit.

|                    | CCTOP<br>(74) | DAS<br>(75) | OCTOPUS<br>(76) | Phobius<br>(77) | Predict<br>Protein<br>(78) | SPLIT<br>(79) | TMHMM<br>(80) | TMpred<br>(81) | TOP<br>CONS<br>(82) |
|--------------------|---------------|-------------|-----------------|-----------------|----------------------------|---------------|---------------|----------------|---------------------|
| <b>Cytoplasmic</b> | 1-11          | 1-11        | 1-13            | 1-11            | 1-10                       | 1-9           | 1-11          | 1-10           | 1-12                |
| <b>TM1</b>         | 12-31         | 12-30       | 14-34           | 12-32           | 11-32                      | 10-33         | 12-34         | 11-32          | 13-33               |
| <b>Periplasmic</b> | 32-95         | 31-95       | 35-96           | 33-95           | 33-95                      | 34-94         | 35-95         | 33-95          | 34-94               |
| <b>TM2</b>         | 96-115        | 96-112      | 97-117          | 96-115          | 96-117                     | 95-116        | 96-118        | 96-113         | 95-115              |
| <b>Cytoplasmic</b> | 116-136       | 113-134     | 118-129         | 116-135         | 118-126                    | 117-132       | 119-138       | 114-132        | 116-129             |
| <b>TM3</b>         | 137-156       | 135-155     | 130-150         | 136-162         | 127-149                    | 133-160       | 139-161       | 133-156        | 130-150             |
| <b>Periplasmic</b> | 157-186       | 156-183     | 151-182         | 163-181         | 150-182                    | 161-179       | 162-182       | 157-183        | 151-181             |
| <b>TM4</b>         | 187-206       | 184-205     | 183-203         | 182-206         | 183-206                    | 180-204       | 183-205       | 185-206        | 182-202             |
| <b>Cytoplasmic</b> | 207-212       | 206-212     | 204-212         | 207-212         | 207-212                    | 205-212       | 206-212       | 207-212        | 203-212             |

Output from several protein topology predictor programs reveals uncertainty in the boundaries of the periplasmic region between transmembrane (TM) regions 3 and 4.

74. Dobson, L., Remenyi, I., and Tusnady, G. E. (2015) CCTOP: a Consensus Constrained TOPology prediction web server. *Nucleic Acids Res.* **43**, W408-412
75. Cserzo, M., Wallin, E., Simon, I., von Heijne, G., and Elofsson, A. (1997) Prediction of transmembrane alpha-helices in prokaryotic membrane proteins: the dense alignment surface method. *Protein Eng.* **10**, 673-676
76. Viklund, H., and Elofsson, A. (2008) OCTOPUS: improving topology prediction by two-track ANN-based preference scores and an extended topological grammar. *Bioinformatics* **24**, 1662-1668
77. Kall, L., Krogh, A., and Sonnhammer, E. L. (2004) A combined transmembrane topology and signal peptide prediction method. *J. Mol. Biol.* **338**, 1027-1036
78. Yachdav, G., Kloppmann, E., Kajan, L., Hecht, M., Goldberg, T., Hamp, T., Honigschmid, P., Schafferhans, A., Roos, M., Bernhofer, M., Richter, L., Ashkenazy, H., Punta, M., Schlessinger, A., Bromberg, Y., Schneider, R., Vriend, G., Sander, C., Ben-Tal, N., and Rost, B. (2014) PredictProtein--an open resource for online prediction of protein structural and functional features. *Nucleic Acids Res.* **42**, W337-343
79. Juretic, D., Zoranic, L., and Zucic, D. (2002) Basic charge clusters and predictions of membrane protein topology. *J. Chem. Inf. Comput. Sci.* **42**, 620-632
80. Krogh, A., Larsson, B., von Heijne, G., and Sonnhammer, E. L. (2001) Predicting transmembrane protein topology with a hidden Markov model: application to complete genomes. *J. Mol. Biol.* **305**, 567-580
81. Hofmann, K., and Stoffel, W. (1993) TMbase-a database of membrane spanning proteins segments. *Biol. Chem. Hoppe-Seyler* **374**
82. Tsirigos, K. D., Peters, C., Shu, N., Kall, L., and Elofsson, A. (2015) The TOPCONS web server for consensus prediction of membrane protein topology and signal peptides. *Nucleic Acids Res.* **43**, W401-407

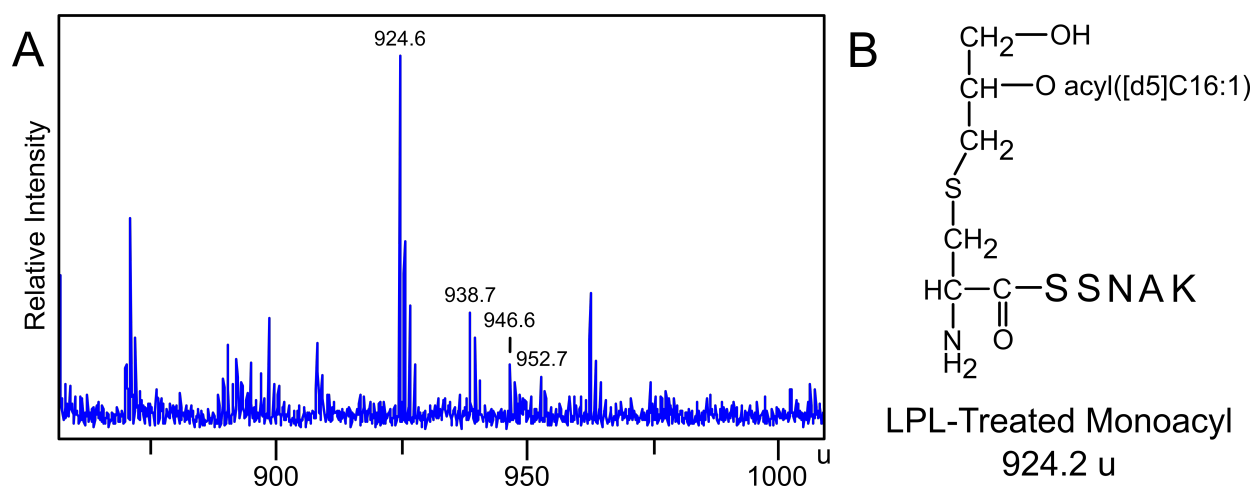

**FIGURE S1. LPL-treatment of [d5]-DA-LppK58A strep removes the *sn*-1 acyl chain.** *A.* [d5]-DA-LppK58A strep was treated with *Pseudomonas* spp. lipoprotein lipase (LPL) and analyzed by MALDI-TOF MS. The prominent peak at 924.6 u indicates a loss of the *sn*-1 linked saturated acyl chain (C<sub>16:0</sub>). *B.* Regiospecific assignment of the *sn*-2 linked monounsaturated C<sub>16:1</sub> acyl chain.

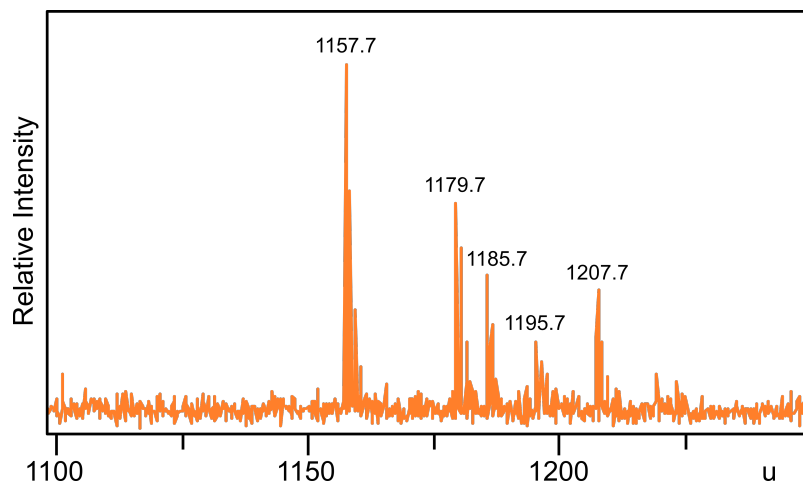

**FIGURE S2. MALDI-TOF MS of lyso-LppK58A strep recovered from *in vitro* reaction with *E. faecalis* Lit.** Parent spectra of the *N*-terminal lipopeptide of trypsinized LppK58A strep ( $C_{32:1}$  total acyl chain length, 1157.7 u, protonated and 1179.7 u, sodiated) isolated from the *in vitro* reconstitution reactions with membranes expressing only *E. faecalis* Lit. The  $\Delta 28$  u ions correspond to acyl chain length heterogeneity ( $C_{34:1}$  total acyl chain length, 1185.7 u, protonated and 1207.7 u, sodiated).

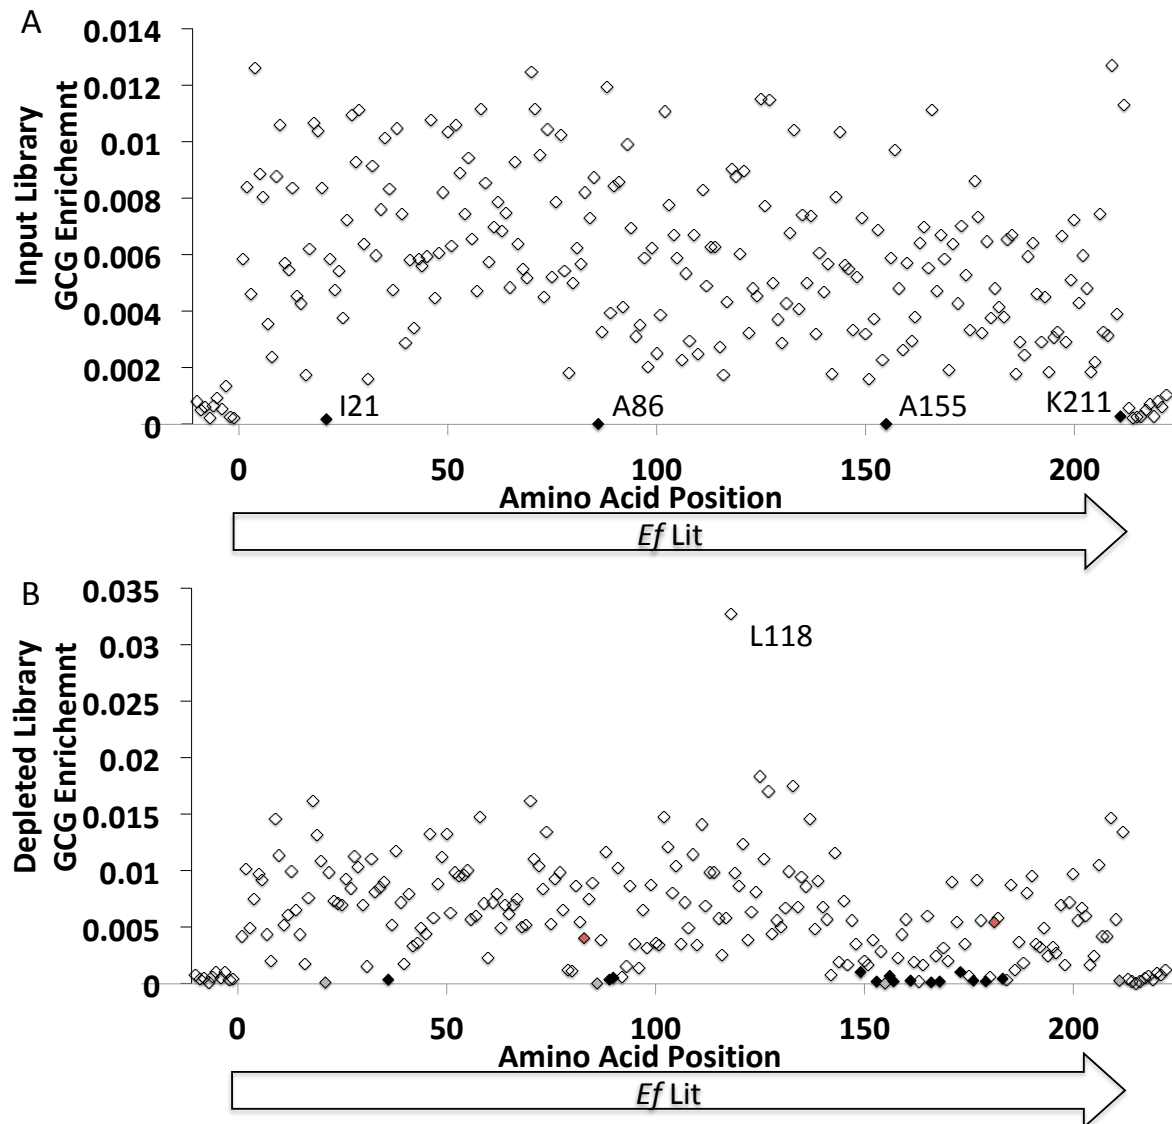

**FIGURE S3. Mut-seq analysis of *E. faecalis* Lit by Ala scanning.** *A.* The enrichment of each Ala encoding GCG triplet was calculated from the next generation read counts and plotted against the corresponding position in the *lit* gene. In-frame triplets upstream (10 amino acids) and downstream (8 amino acids) of the coding region which were not targeted for mutagenesis are shown for comparison. Residues I21 and K211 were not sufficiently represented in the input library to be considered in the analysis of important residues, while A86 and A155 are encoded by native GCG alanine triplets and mutagenesis results in synonymous codon replacement (*black shaded*). *B.* The enrichment of the GCG triplets from the same input library passaged in the absence of arabinose inducer. The respective plasmid encoded Lit allele is the sole means for lipoprotein *N*-acylation and growth rescue under these culture conditions. Residues for which importance could not be determined are *gray shaded* (listed in panel *A* above), while residues further evaluated for function are indicated (important for growth rescue are *black shaded* while negative controls are *red shaded* and correspond to Fig. 6 from text).

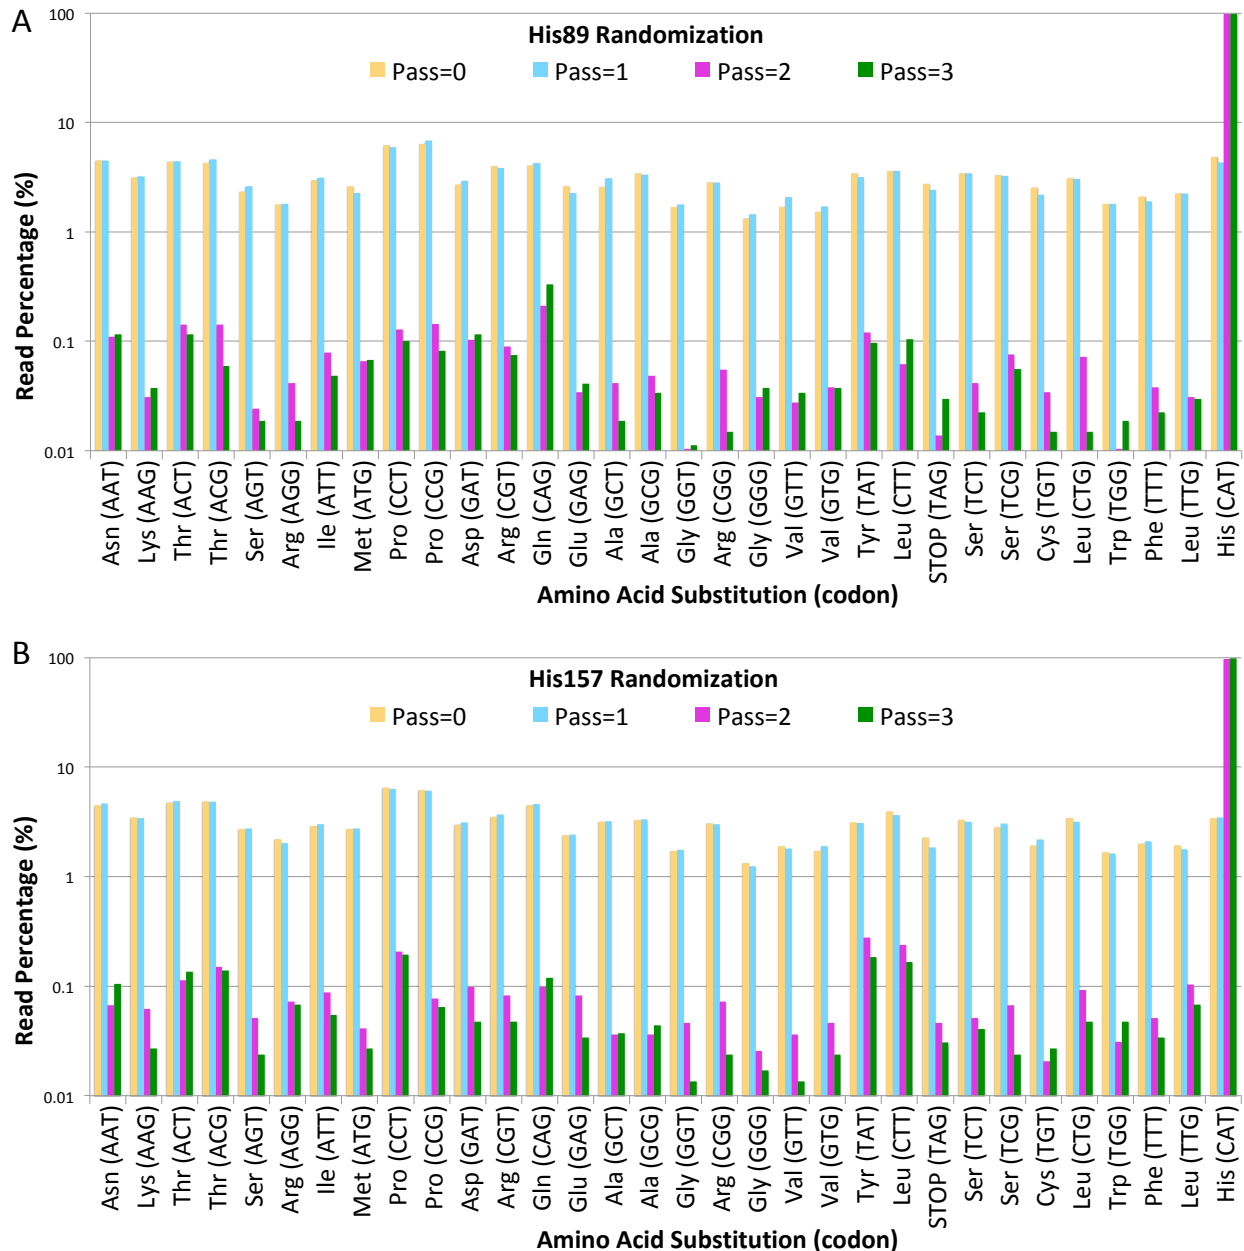

**FIGURE S4. Randomization of His89 and His157 codon.** A library of *E. faecalis lit* alleles was generated by introducing the NNK triplet into the His89 (A) or His 157 (B) position and transformed into *E. coli*  $\Delta lpp$   $P_{BAD}$ -*lnt* to evaluate rescue after three successive passages in the absence of arabinose inducer. Plasmid pools were isolated and sequenced to calculate read count percentages for each possible NNK triplet variant within the total population of the input (Pass=0) and ensuing sequential passages (Pass=1, 2, or 3).
